# Supplementary material
Source: PubMed Central journal article supplement (PMC9006108)

## Supplemental Online Content

Venkatesh KK, Lynch CD, Powe CE, et al. Risk of adverse pregnancy outcomes among pregnant individuals with gestational diabetes by race and ethnicity in the United States, 2014-2020. *JAMA*. doi:10.1001/jama.2022.3189

**eTable 1.** Maternal Characteristics Overall and by Whether or Not Included in the Analytic Sample, U.S. Natality Files, 2014-2020

**eTable 2.** Maternal and Infant Outcomes From 2014 to 2020 to Pregnant Individuals Age 15 to 44 Years With Gestational Diabetes

**eTable 3.** Maternal and Infant Outcomes in Nulliparous Pregnant Individuals Age 15 to 44 Years With Gestational Diabetes, U.S. Natality Files, 2014-2020

**eTable 4.** Association Between Race and Ethnicity and Adverse Pregnancy Outcomes Among Pregnant Individuals With Gestational Diabetes, U.S. Natality Files, Restricted to 2016-2020

**eTable 5.** Association Between Race and Ethnicity and Adverse Pregnancy Outcomes Restricted to Nulliparous Pregnant Individuals With Gestational Diabetes, U.S. Natality Files, 2014-2020

**eTable 6.** Disparity Ratios for Adverse Pregnancy Outcomes Comparing Each Subgroup to White Individuals (Reference), U.S. Natality Files, 2014-2020

**eTable 7.** P-values for Interaction of Race/Ethnicity (Referent White Individuals) With Year of Delivery, U.S. Natality Files, 2014-2020

**eFigure.** Directed Acyclic Graph

This supplemental material has been provided by the authors to give readers additional information about their work.

**eTable 1. Maternal Characteristics Overall and by Whether or Not Included in the Analytic Sample, U.S. Natality Files, 2014-2020**

| Characteristic                                       | Overall                           | Final analytic sample           | Excluded                          |
|------------------------------------------------------|-----------------------------------|---------------------------------|-----------------------------------|
|                                                      | 26,986,716                        | 1,560,822                       | 25,425,894                        |
| Age (years) <sup>a</sup>                             | 29 (24, 33)                       | 31 (27, 35)                     | 29 (24, 33)                       |
| Delivery year                                        |                                   |                                 |                                   |
| 2014                                                 | 3,998,175 (14.8)                  | 192,236 (12.3)                  | 3,805,939 (15.0)                  |
| 2015                                                 | 3,988,733 (14.8)                  | 199,661 (12.8)                  | 3,789,072 (14.9)                  |
| 2016                                                 | 3,956,112 (14.7)                  | 215,275 (13.8)                  | 3,740,837 (14.7)                  |
| 2017                                                 | 3,864,754 (14.3)                  | 224,631 (14.4)                  | 3,640,123 (14.3)                  |
| 2018                                                 | 3,801,534 (14.1)                  | 231,596 (14.8)                  | 3,569,938 (14.0)                  |
| 2019                                                 | 3,757,582 (13.9)                  | 237,681 (15.2)                  | 3,519,901 (13.8)                  |
| 2020                                                 | 3,619,826 (13.4)                  | 259,742 (16.6)                  | 3,360,084 (13.2)                  |
| Multiparous                                          | 16,608,443 /<br>26,892,524 (61.8) | 1,030,197 /<br>1,557,592 (66.1) | 15,578,246 /<br>25,334,932 (61.5) |
| Tobacco use during pregnancy                         | 1,830,820 /<br>26,574,146 (6.9)   | 96,978 / 1,552,942<br>(6.2)     | 1,733,842 /<br>25,021,204 (6.9)   |
| Education (n=26,423,488)                             |                                   |                                 |                                   |
| Some high school or less                             | 3,539,183 (13.4)                  | 213,504 (13.8)                  | 3,325,679 (13.4)                  |
| High school graduate                                 | 6,766,374 (25.6)                  | 372,720 (24.1)                  | 6,393,654 (25.7)                  |
| Any college                                          | 16,117,931 (61.0)                 | 961,168 (62.1)                  | 15,156,763 (60.9)                 |
| Insurance (n=26,588,123)                             |                                   |                                 |                                   |
| Medicaid                                             | 11,327,310 (42.6)                 | 656,663 (42.3)                  | 10,670,647 (42.6)                 |
| Private Insurance                                    | 13,095,260 (49.3)                 | 790,493 (50.9)                  | 12,304,767 (49.2)                 |
| Self-pay                                             | 1,131,007 (4.3)                   | 48,486 (3.1)                    | 1,082,521 (4.3)                   |
| Other <sup>1</sup>                                   | 1,034,546 (3.9)                   | 56,434 (3.6)                    | 978,112 (3.9)                     |
| WIC enrolled                                         | 9,987,079 /<br>26,384,586 (37.9)  | 599,580 /<br>1,541,676 (38.9)   | 9,387,499 /<br>24,842,910 (37.8)  |
| Prenatal care (n=26,027,729)                         |                                   |                                 |                                   |
| Started in 1 <sup>st</sup> trimester                 | 20,093,658 (77.2)                 | 1,221,761 (79.9)                | 18,871,897 (77.0)                 |
| Stated in 2 <sup>nd</sup> trimester                  | 4,315,667 (16.6)                  | 237,490 (15.5)                  | 4,078,177 (16.7)                  |
| Started in 3 <sup>rd</sup> trimester                 | 1,618,404 (6.2)                   | 70,379 (4.6)                    | 1,548,025 (6.3)                   |
| Pregestational BMI, kg/m <sup>2</sup> (n=26,053,097) |                                   |                                 |                                   |
| <25, Underweight/nomal                               | 12,113,282 (46.5)                 | 412,493 (27.0)                  | 11,700,789 (47.7)                 |
| 25-<30, Overweight                                   | 6,862,024 (26.3)                  | 403,145 (26.4)                  | 6,458,879 (26.3)                  |
| 30-<35, Class I obesity                              | 3,844,621 (14.8)                  | 328,394 (21.5)                  | 3,516,227 (14.3)                  |
| 35-39, Class II obesity                              | 1,888,368 (7.3)                   | 203,808 (13.4)                  | 1,684,560 (6.9)                   |
| ≥40, Class III obesity                               | 1,344,802 (5.2)                   | 177,963 (11.7)                  | 1,166,839 (4.8)                   |
| Chronic hypertension                                 | 519,668 /<br>26,746,076 (1.9)     | 71,236 / 1,560,822<br>(4.6)     | 448,432 /<br>25,185,254 (1.8)     |
| Prior cesarean delivery                              | 4,105,982 /<br>26,746,076 (15.4)  | 323,882 /<br>1,560,822 (20.8)   | 3,782,100 /<br>25,185,254 (15.0)  |
| Prior preterm birth among multipara                  | 872,486 /<br>16,469,129 (5.3)     | 75,029 / 1,030,197<br>(7.3)     | 797,457 /<br>15,438,932 (5.2)     |

<sup>a</sup>Median (IQR).

Abbreviations: IQR (interquartile range), SD (standard deviation), BMI (body mass index), WIC (Special Supplemental Nutrition Program for Women, Infants, and Children).

**eTable 2. Maternal and Infant Outcomes From 2014 to 2020 to Pregnant Individuals Age 15 to 44 Years With Gestational Diabetes**

|                                            | Frequency, n / 1,000 live births (95% CI) in 2014 | Frequency, n / 1,000 live births (95% CI) in 2020 | Mean annual percent change, APC (95% CI) from 2014 to 2020 <sup>a</sup> |
|--------------------------------------------|---------------------------------------------------|---------------------------------------------------|-------------------------------------------------------------------------|
| <b>Maternal outcomes</b>                   |                                                   |                                                   |                                                                         |
| Cesarean delivery                          |                                                   |                                                   |                                                                         |
| American Indian                            | 366.0 (347.2 to 384.7)                            | 350.5 (333.5 to 367.5)                            | -0.5 (-1.5 to 0.5)                                                      |
| Asian/Pacific Islander                     | 384.7 (378.4 to 391.1)                            | 365.4 (360.1 to 370.6)                            | -0.9 (-1.2 to -0.7)                                                     |
| Black                                      | 482.4 (466.0 to 488.9)                            | 465.6 (460.1 to 471.0)                            | -0.8 (-1.2 to -0.3)                                                     |
| Hispanic/Latina                            | 414.5 (410.2 to 418.8)                            | 394.2 (390.6 to 397.9)                            | -0.9 (-1.1 to -0.6)                                                     |
| White                                      | 409.7 (406.5 to 412.8)                            | 391.3 (388.6 to 394.1)                            | -0.8 (-1.0 to -0.6)                                                     |
| Overall                                    | 416.1 (413.9 to 418.3)                            | 397.6 (395.8 to 399.5)                            | -1.4 (-1.7 to -1.1)                                                     |
| Primary cesarean delivery <sup>b</sup>     |                                                   |                                                   |                                                                         |
| American Indian                            | 242.0 (223.4 to 260.6)                            | 222.2 (205.6 to 238.7)                            | -0.8 (-2.7 to 1.1)                                                      |
| Asian/Pacific Islander                     | 269.0 (262.5 to 275.4)                            | 251.7 (246.4 to 256.9)                            | -1.1 (-1.7 to -0.6)                                                     |
| Black                                      | 357.3 (350.2 to 364.3)                            | 329.5 (323.6 to 335.4)                            | -1.5 (-1.8 to -1.2)                                                     |
| Hispanic/Latina                            | 263.1 (258.7 to 267.5)                            | 246.0 (242.4 to 249.7)                            | -1.0 (-1.5 to -0.5)                                                     |
| White                                      | 292.2 (289.0 to 295.4)                            | 272.5 (269.7 to 275.2)                            | -1.2 (-1.8 to -0.6) <sup>e</sup>                                        |
| Overall                                    | 289.0 (286.7 to 291.2)                            | 269.1 (267.1 to 271.0)                            | -1.2 (-1.5 to -0.9)                                                     |
| Preeclampsia or gestational hypertension   |                                                   |                                                   |                                                                         |
| American Indian                            | 132.3 (119.1 to 145.5)                            | 181.4 (167.7 to 195.2)                            | 5.7 (3.7 to 7.8)                                                        |
| Asian/Pacific Islander                     | 59.5 (56.4 to 62.6)                               | 84.9 (81.8 to 87.9)                               | 4.6 (1.1 to 8.2)                                                        |
| Black                                      | 146.4 (141.8 to 150.9)                            | 178.3 (174.1 to 182.5)                            | 3.2 (2.5 to 4.0)                                                        |
| Hispanic/Latina                            | 98.7 (96.1 to 101.3)                              | 133.2 (130.7 to 135.7)                            | 5.1 (4.3 to 5.8)                                                        |
| White                                      | 117.1 (115.0 to 119.1)                            | 148.7 (146.7 to 150.7)                            | 4.2 (3.3 to 5.1)                                                        |
| Overall                                    | 109.2 (107.8 to 110.6)                            | 140.7 (139.3 to 142.0)                            | 4.2 (3.3 to 5.2)                                                        |
| Intensive care unit admission <sup>c</sup> |                                                   |                                                   |                                                                         |
| American Indian                            | 2.3 (0.4 to 4.2)                                  | 0.9 (-0.1 to 2.1)                                 | -2.4 (-32.3 to 40.8)                                                    |
| Asian/Pacific Islander                     | 2.0 (1.4 to 2.6)                                  | 2.3 (1.8 to 2.8)                                  | 5.8 (-3.5 to 16.0)                                                      |
| Black                                      | 3.5 (2.7 to 4.3)                                  | 2.8 (2.2 to 3.4)                                  | -2.5 (-6.7 to 1.7)                                                      |
| Hispanic/Latina                            | 2.7 (2.2 to 3.1)                                  | 2.0 (1.7 to 2.3)                                  | -3.0 (-9.2 to 3.8)                                                      |
| White                                      | 1.7 (1.5 to 2.0)                                  | 3.5 (2.7 to 4.3)                                  | 2.7 (-2.5 to 8.3)                                                       |
| Overall                                    | 2.2 (2.0 to 2.4)                                  | 2.0 (1.8 to 2.2)                                  | 0.5 (-5.2 to 6.5)                                                       |
| Transfusion <sup>c</sup>                   |                                                   |                                                   |                                                                         |
| American Indian                            | 8.2 (4.7 to 11.8)                                 | 15.8 (11.3 to 20.2)                               | 14.0 (2.5 to 26.9)                                                      |
| Asian/Pacific Islander                     | 3.0 (2.3 to 3.8)                                  | 5.1 (4.4 to 5.9)                                  | 10.1 (2.8 to 17.8)                                                      |
| Black                                      | 4.4 (3.5 to 5.2)                                  | 5.3 (4.5 to 6.1)                                  | 6.7 (-1.1 to 15.2)                                                      |
| Hispanic/Latina                            | 3.1 (2.6 to 3.6)                                  | 5.1 (4.5 to 5.6)                                  | 7.2 (3.1 to 11.4)                                                       |
| White                                      | 3.5 (3.2 to 3.9)                                  | 5.2 (4.8 to 5.6)                                  | 8.0 (3.0 to 13.4)                                                       |
| Overall                                    | 3.5 (3.3 to 3.8)                                  | 5.3 (5.0 to 5.6)                                  | 8.0 (3.8 to 12.4)                                                       |
| <b>Infant outcomes</b>                     |                                                   |                                                   |                                                                         |
| Preterm birth <37 weeks <sup>d</sup>       |                                                   |                                                   |                                                                         |
| American Indian                            | 112.1 (99.8 to 124.4)                             | 123.8 (112.1 to 135.5)                            | 2.3 (0.6 to 4.1)                                                        |
| Asian/Pacific Islander                     | 92.4 (88.6 to 96.2)                               | 96.9 (93.7 to 100.1)                              | 0.6 (-0.6 to 1.9)                                                       |
| Black                                      | 150.0 (145.3 to 154.6)                            | 157.8 (153.8 to 161.7)                            | 0.9 (0.1 to 1.8)                                                        |
| Hispanic/Latina                            | 115.3 (112.5 to 118.1)                            | 120.8 (118.4 to 123.2)                            | 1.1 (0.3 to 1.8)                                                        |
| White                                      | 98.7 (96.8 to 100.6)                              | 103.0 (101.2 to 104.7)                            | 0.8 (0.3 to 1.4)                                                        |
| Overall                                    | 108.6 (107.2 to 110.0)                            | 114.1 (112.9 to 115.3)                            | 0.9 (0.3 to 1.5)                                                        |
| NICU admission                             |                                                   |                                                   |                                                                         |
| American Indian                            | 104.0 (92.1 to 115.9)                             | 107.7 (96.7 to 118.7)                             | 0.0 (-1.1 to 1.1)                                                       |
| Asian/Pacific Islander                     | 99.4 (95.5 to 103.3)                              | 97.9 (94.7 to 101.2)                              | 0.0 (-1.1 to 1.1) <sup>e</sup>                                          |
| Black                                      | 150.2 (145.6 to 154.9)                            | 158.6 (154.6 to 162.6)                            | 1.0 (-1.7 to 3.9) <sup>e</sup>                                          |

|                                              |                        |                        |                               |
|----------------------------------------------|------------------------|------------------------|-------------------------------|
| Hispanic/Latina                              | 108.0 (105.3 to 110.7) | 113.8 (111.4 to 116.1) | 0.9 (0.7 to 1.1) <sup>e</sup> |
| White                                        | 98.2 (96.3 to 100.1)   | 107.5 (105.7 to 109.2) | 1.6 (0.9 to 2.3)              |
| Overall                                      | 107.2 (105.8 to 108.5) | 114.4 (113.1 to 115.6) | 1.0 (0.3 to 1.7)              |
| <b>Large-for-gestational age<sup>d</sup></b> |                        |                        |                               |
| American Indian                              | 267.1 (249.8 to 284.5) | 247.1 (231.7 to 262.4) | -1.1 (-1.9 to -0.3)           |
| Asian/Pacific Islander                       | 103.6 (99.6 to 107.6)  | 83.0 (79.9 to 86.0)    | -3.9 (-4.9 to -2.9)           |
| Black                                        | 189.8 (184.7 to 194.9) | 164.9 (160.9 to 169.0) | -2.4 (-3.1 to -1.7)           |
| Hispanic/Latina                              | 203.8 (200.2 to 207.3) | 179.4 (176.5 to 182.2) | -2.2 (-2.9 to -1.5)           |
| White                                        | 205.9 (203.3 to 208.5) | 184.9 (182.7 to 187.1) | -2.0 (-2.5 to -1.5)           |
| Overall                                      | 192.3 (190.6 to 194.1) | 169.0 (167.6 to 170.4) | -2.3 (-2.8 to -1.8)           |
| <b>Macrosomia<sup>d</sup></b>                |                        |                        |                               |
| American Indian                              | 185.3 (170.2 to 200.5) | 149.9 (137.2 to 162.6) | -3.4 (-4.4 to -2.4)           |
| Asian/Pacific Islander                       | 62.8 (59.6 to 65.9)    | 44.1 (41.9 to 46.4)    | -5.9 (-7.1 to -4.7)           |
| Black                                        | 110.3 (106.2 to 114.3) | 85.4 (82.4 to 88.5)    | -4.3 (-5.4 to -3.1)           |
| Hispanic/Latina                              | 130.6 (127.7 to 133.6) | 98.8 (96.6 to 101.0)   | -4.6 (-5.4 to -3.9)           |
| White                                        | 128.3 (126.2 to 130.5) | 100.5 (98.8 to 102.2)  | -4.5 (-5.3 to -3.6)           |
| Overall                                      | 119.9 (118.4 to 121.3) | 91.7 (90.6 to 92.8)    | -4.7 (-5.3 to -4.0)           |
| <b>Small-for-gestational age<sup>d</sup></b> |                        |                        |                               |
| American Indian                              | 54.4 (45.5 to 63.3)    | 63.5 (54.8 to 72.2)    | 1.6 (-0.9 to 4.2)             |
| Asian/Pacific Islander                       | 125.3 (121.0 to 129.7) | 139.7 (135.9 to 143.5) | 1.7 (0.5 to 2.9)              |
| Black                                        | 106.7 (102.6 to 110.6) | 99.8 (96.5 to 103.0)   | -0.5 (-1.7 to 0.7)            |
| Hispanic/Latina                              | 70.2 (68.0 to 72.4)    | 71.2 (69.4 to 73.1)    | 0.4 (0.2 to 0.5) <sup>f</sup> |
| White                                        | 68.0 (66.3 to 69.6)    | 65.6 (64.2 to 66.9)    | -0.4 (-1.4 to 0.5)            |
| Overall                                      | 79.7 (78.4 to 80.9)    | 80.5 (79.5 to 81.6)    | 0.4 (-0.3 to 1.1)             |

<sup>a</sup>To quantify the trend over time from 2014 to 2020, the mean annual percent change of the outcome rate was calculated.

<sup>b</sup>Analysis conducted among individuals without a prior history of cesarean delivery.

<sup>c</sup>Outcome ascertained at delivery hospitalization.

<sup>d</sup>Preterm birth included a birth <37 weeks based on the best obstetric estimate for any indication. Large-for-gestational-age was defined as a parity-specific standardized birthweight >90th percentile, and small-for-gestational-age as <10th percentile. Macrosomia was defined as a birthweight >4,000 grams.

<sup>e</sup>Joinpoint regression introduced an inflection point in the year 2016.

<sup>f</sup>Joinpoint regression introduced an inflection point in the year 2018.

Abbreviations: CI (confidence interval), NICU (neonatal intensive care unit).

| <b>eTable 3. Maternal and Infant Outcomes in Nulliparous Pregnant Individuals Age 15 to 44 Years With Gestational Diabetes, U.S. Natality Files, 2014-2020</b> |                                                          |                                                          |                                                                               |
|----------------------------------------------------------------------------------------------------------------------------------------------------------------|----------------------------------------------------------|----------------------------------------------------------|-------------------------------------------------------------------------------|
|                                                                                                                                                                | <b>Frequency, n / 1,000 live births (95% CI) in 2014</b> | <b>Frequency, n / 1,000 live births (95% CI) in 2020</b> | <b>Mean annual percent change, APC (95% CI) from 2014 to 2020<sup>a</sup></b> |
| <b>Maternal outcomes</b>                                                                                                                                       |                                                          |                                                          |                                                                               |
| Cesarean delivery                                                                                                                                              |                                                          |                                                          |                                                                               |
| American Indian                                                                                                                                                | 358.7 (321.9 to 395.4)                                   | 376.3 (342.0 to 410.6)                                   | 0.4 (-1.0 to 1.9)                                                             |
| Asian/Pacific Islander                                                                                                                                         | 378.7 (368.9 to 388.5)                                   | 360.0 (351.9 to 368.1)                                   | -0.9 (-1.5 to -0.4)                                                           |
| Black                                                                                                                                                          | 503.1 (491.5 to 514.7)                                   | 478.8 (468.9 to 488.7)                                   | -0.9 (-1.5 to -0.3)                                                           |
| Hispanic/Latina                                                                                                                                                | 427.5 (418.7 to 436.3)                                   | 392.2 (385.2 to 399.1)                                   | -1.4 (-2.1 to -0.7)                                                           |
| White                                                                                                                                                          | 409.5 (404.3 to 414.6)                                   | 389.6 (385.1 to 394.1)                                   | -0.8 (-0.9 to -0.7)                                                           |
| Overall                                                                                                                                                        | 418.2 (414.4 to 422.0)                                   | 395.4 (392.2 to 398.6)                                   | -1.0 (-1.1 to -0.8)                                                           |
| Primary cesarean delivery <sup>c</sup>                                                                                                                         |                                                          |                                                          |                                                                               |
| American Indian                                                                                                                                                | 358.7 (321.9 to 395.4)                                   | 376.3 (342.0 to 410.6)                                   | 0.4 (-1.0 to 1.7)                                                             |
| Asian/Pacific Islander                                                                                                                                         | 377.9 (368.1 to 387.7)                                   | 359.7 (351.7 to 367.8)                                   | -0.9 (-1.4 to -0.3)                                                           |
| Black                                                                                                                                                          | 502.3 (490.7 to 513.9)                                   | 478.1 (468.2 to 488.0)                                   | -0.9 (-1.5 to -0.3)                                                           |
| Hispanic/Latina                                                                                                                                                | 426.6 (417.8 to 435.4)                                   | 391.2 (384.8 to 398.6)                                   | -1.4 (-2.1 to -0.7)                                                           |
| White                                                                                                                                                          | 408.9 (403.8 to 414.0)                                   | 389.2 (384.7 to 393.7)                                   | -0.8 (-0.9 to -0.7)                                                           |
| Overall                                                                                                                                                        | 417.5 (413.7 to 421.3)                                   | 394.9 (391.7 to 398.2)                                   | -0.9 (-1.1 to -0.8)                                                           |
| Preeclampsia or gestational hypertension                                                                                                                       |                                                          |                                                          |                                                                               |
| American Indian                                                                                                                                                | 186.7 (156.8 to 216.5)                                   | 261.4 (230.3 to 292.5)                                   | 5.8 (3.1 to 8.6)                                                              |
| Asian/Pacific Islander                                                                                                                                         | 68.8 (63.7 to 73.9)                                      | 97.1 (92.1 to 102.1)                                     | 4.4 (0.4 to 8.7)                                                              |
| Black                                                                                                                                                          | 174.8 (166.0 to 183.6)                                   | 221.7 (213.5 to 229.9)                                   | 4.0 (2.9 to 5.1)                                                              |
| Hispanic/Latina                                                                                                                                                | 131.5 (125.5 to 137.5)                                   | 169.4 (164.1 to 174.7)                                   | 4.2 (3.5 to 4.9)                                                              |
| White                                                                                                                                                          | 142.3 (138.7 to 146.0)                                   | 180.2 (176.7 to 183.7)                                   | 3.9 (3.0 to 4.8)                                                              |
| Overall                                                                                                                                                        | 133.6 (131.0 to 136.3)                                   | 170.4 (167.9 to 172.9)                                   | 3.9 (2.8 to 5.0)                                                              |
| Intensive care unit admission <sup>d</sup>                                                                                                                     |                                                          |                                                          |                                                                               |
| American Indian                                                                                                                                                | -- <sup>b</sup>                                          | -- <sup>b</sup>                                          | -- <sup>b</sup>                                                               |
| Asian/Pacific Islander                                                                                                                                         | 1.9 (1.0 to 2.8)                                         | 2.1 (1.4 to 2.9)                                         | 6.9 (-5.8 to 21.4)                                                            |
| Black                                                                                                                                                          | 4.2 (2.7 to 5.7)                                         | 2.1 (1.2 to 3.1)                                         | -6.6 (-17.2 to 5.4)                                                           |
| Hispanic/Latina                                                                                                                                                | 2.7 (1.8 to 3.6)                                         | 1.8 (1.2 to 2.4)                                         | -3.7 (-12.5 to 6.1)                                                           |
| White                                                                                                                                                          | 2.2 (1.7 to 2.7)                                         | 1.7 (1.3 to 2.1)                                         | -0.1 (-7.7 to 8.1)                                                            |
| Overall                                                                                                                                                        | 2.4 (2.1 to 2.8)                                         | 1.8 (1.6 to 2.1)                                         | -1.0 (-8.9 to 7.7)                                                            |
| Transfusion <sup>d</sup>                                                                                                                                       |                                                          |                                                          |                                                                               |
| American Indian                                                                                                                                                | 6.0 (0.1 to 12.0)                                        | 26.0 (14.8 to 37.3)                                      | 28.3 (21.0 to 36.1)                                                           |
| Asian/Pacific Islander                                                                                                                                         | 3.4 (2.2 to 4.6)                                         | 5.2 (4.0 to 6.5)                                         | 9.8 (-0.2 to 20.8)                                                            |
| Black                                                                                                                                                          | 2.9 (1.7 to 4.2)                                         | 4.9 (3.5 to 6.3)                                         | 6.2 (-0.4 to 13.1)                                                            |
| Hispanic/Latina                                                                                                                                                | 2.9 (1.9 to 3.8)                                         | 5.1 (4.1 to 6.1)                                         | 7.7 (2.2 to 13.5)                                                             |
| White                                                                                                                                                          | 3.7 (3.1 to 4.3)                                         | 5.9 (5.2 to 6.6)                                         | 10.0 (3.5 to 16.8)                                                            |
| Overall                                                                                                                                                        | 3.4 (3.0 to 3.9)                                         | 5.7 (5.2 to 6.2)                                         | 9.6 (5.3 to 14.2)                                                             |
| <b>Infant outcomes</b>                                                                                                                                         |                                                          |                                                          |                                                                               |
| Preterm birth <37 weeks <sup>e</sup>                                                                                                                           |                                                          |                                                          |                                                                               |
| American Indian                                                                                                                                                | 116.8 (92.3 to 141.4)                                    | 126.1 (102.6 to 149.7)                                   | 0.7 (-2.0 to 3.4)                                                             |
| Asian/Pacific Islander                                                                                                                                         | 92.2 (86.3 to 98.0)                                      | 100.8 (95.7 to 105.8)                                    | 0.8 (-0.9 to 2.6)                                                             |
| Black                                                                                                                                                          | 152.3 (144.0 to 160.6)                                   | 161.8 (154.5 to 169.1)                                   | 1.1 (0.1 to 2.1)                                                              |
| Hispanic/Latina                                                                                                                                                | 122.2 (116.3 to 128.0)                                   | 120.7 (116.1 to 125.3)                                   | -0.1 (-0.7 to 0.5)                                                            |
| White                                                                                                                                                          | 102.9 (99.7 to 106.0)                                    | 107.0 (104.2 to 109.9)                                   | 0.7 (-0.2 to 1.5)                                                             |
| Overall                                                                                                                                                        | 110.5 (108.1 to 112.9)                                   | 115.2 (113.1 to 117.3)                                   | 0.6 (-0.1 to 1.4)                                                             |
| NICU admission                                                                                                                                                 |                                                          |                                                          |                                                                               |
| American Indian                                                                                                                                                | 120.2 (95.3 to 145.2)                                    | 101.4 (80.0 to 122.8)                                    | -3.9 (-8.7 to 1.3)                                                            |
| Asian/Pacific Islander                                                                                                                                         | 121.0 (114.3 to 127.5)                                   | 115.2 (109.9 to 120.6)                                   | -0.6 (-2.6 to 1.3) <sup>f</sup>                                               |
| Black                                                                                                                                                          | 168.8 (160.1 to 177.6)                                   | 177.2 (169.6 to 184.8)                                   | 0.9 (-1.8 to 3.7) <sup>f</sup>                                                |

|                                                                                                                                                                                                                                                                                                                                                                                                                                                                                                                                                                                                                                                                                                                                                                                                                                                                                                                                                                          |                        |                        |                                  |
|--------------------------------------------------------------------------------------------------------------------------------------------------------------------------------------------------------------------------------------------------------------------------------------------------------------------------------------------------------------------------------------------------------------------------------------------------------------------------------------------------------------------------------------------------------------------------------------------------------------------------------------------------------------------------------------------------------------------------------------------------------------------------------------------------------------------------------------------------------------------------------------------------------------------------------------------------------------------------|------------------------|------------------------|----------------------------------|
| Hispanic/Latina                                                                                                                                                                                                                                                                                                                                                                                                                                                                                                                                                                                                                                                                                                                                                                                                                                                                                                                                                          | 140.2 (134.0 to 146.4) | 132.7 (127.9 to 137.5) | -1.1 (-1.6 to -0.5) <sup>f</sup> |
| White                                                                                                                                                                                                                                                                                                                                                                                                                                                                                                                                                                                                                                                                                                                                                                                                                                                                                                                                                                    | 112.4 (109.1 to 115.7) | 120.1 (117.1 to 123.1) | 1.2 (0.6 to 1.8)                 |
| Overall                                                                                                                                                                                                                                                                                                                                                                                                                                                                                                                                                                                                                                                                                                                                                                                                                                                                                                                                                                  | 125.1 (122.6 to 127.7) | 128.2 (126.0 to 130.4) | 0.3 (-0.7 to 1.2)                |
| Large-for-gestational age <sup>e</sup>                                                                                                                                                                                                                                                                                                                                                                                                                                                                                                                                                                                                                                                                                                                                                                                                                                                                                                                                   |                        |                        |                                  |
| American Indian                                                                                                                                                                                                                                                                                                                                                                                                                                                                                                                                                                                                                                                                                                                                                                                                                                                                                                                                                          | 221.8 (190.0 to 253.7) | 247.0 (216.5 to 277.6) | 0.6 (-2.5 to 3.7)                |
| Asian/Pacific Islander                                                                                                                                                                                                                                                                                                                                                                                                                                                                                                                                                                                                                                                                                                                                                                                                                                                                                                                                                   | 85.4 (79.7 to 91.0)    | 64.9 (60.7 to 69.0)    | -4.6 (-6.5 to -2.6)              |
| Black                                                                                                                                                                                                                                                                                                                                                                                                                                                                                                                                                                                                                                                                                                                                                                                                                                                                                                                                                                    | 178.9 (170.0 to 187.8) | 150.5 (143.4 to 157.6) | -2.8 (-4.1 to -1.5)              |
| Hispanic/Latina                                                                                                                                                                                                                                                                                                                                                                                                                                                                                                                                                                                                                                                                                                                                                                                                                                                                                                                                                          | 186.0 (179.1 to 192.9) | 165.9 (160.7 to 171.2) | -1.8 (-2.2 to -1.4)              |
| White                                                                                                                                                                                                                                                                                                                                                                                                                                                                                                                                                                                                                                                                                                                                                                                                                                                                                                                                                                    | 187.4 (183.4 to 191.5) | 173.1 (169.7 to 176.6) | -1.4 (-2.0 to -0.8)              |
| Overall                                                                                                                                                                                                                                                                                                                                                                                                                                                                                                                                                                                                                                                                                                                                                                                                                                                                                                                                                                  | 171.7 (168.8 to 174.6) | 153.1 (150.8 to 155.5) | -2.0 (-2.5 to -1.4)              |
| Macrosomia <sup>e</sup>                                                                                                                                                                                                                                                                                                                                                                                                                                                                                                                                                                                                                                                                                                                                                                                                                                                                                                                                                  |                        |                        |                                  |
| American Indian                                                                                                                                                                                                                                                                                                                                                                                                                                                                                                                                                                                                                                                                                                                                                                                                                                                                                                                                                          | 129.2 (103.5 to 154.9) | 102.7 (81.2 to 124.2)  | -4.2 (-7.8 to -0.4)              |
| Asian/Pacific Islander                                                                                                                                                                                                                                                                                                                                                                                                                                                                                                                                                                                                                                                                                                                                                                                                                                                                                                                                                   | 41.6 (37.5 to 45.6)    | 26.0 (23.4 to 28.7)    | -6.9 (-9.3 to -4.4)              |
| Black                                                                                                                                                                                                                                                                                                                                                                                                                                                                                                                                                                                                                                                                                                                                                                                                                                                                                                                                                                    | 84.3 (77.9 to 90.8)    | 58.9 (54.3 to 63.6)    | -5.9 (-7.3 to -4.4)              |
| Hispanic/Latina                                                                                                                                                                                                                                                                                                                                                                                                                                                                                                                                                                                                                                                                                                                                                                                                                                                                                                                                                          | 91.4 (86.3 to 96.5)    | 68.0 (64.4 to 71.6)    | -4.6 (-5.6 to -3.5)              |
| White                                                                                                                                                                                                                                                                                                                                                                                                                                                                                                                                                                                                                                                                                                                                                                                                                                                                                                                                                                    | 94.2 (91.1 to 97.2)    | 71.6 (69.2 to 73.9)    | -4.7 (-5.4 to -4.1)              |
| Overall                                                                                                                                                                                                                                                                                                                                                                                                                                                                                                                                                                                                                                                                                                                                                                                                                                                                                                                                                                  | 85.3 (83.1 to 87.4)    | 62.7 (61.1 to 64.3)    | -5.1 (-5.5 to -4.7)              |
| Small-for-gestational age <sup>e</sup>                                                                                                                                                                                                                                                                                                                                                                                                                                                                                                                                                                                                                                                                                                                                                                                                                                                                                                                                   |                        |                        |                                  |
| American Indian                                                                                                                                                                                                                                                                                                                                                                                                                                                                                                                                                                                                                                                                                                                                                                                                                                                                                                                                                          | 63.8 (45.1 to 82.5)    | 63.7 (46.4 to 81.0)    | -1.4 (-8.5 to 6.3)               |
| Asian/Pacific Islander                                                                                                                                                                                                                                                                                                                                                                                                                                                                                                                                                                                                                                                                                                                                                                                                                                                                                                                                                   | 134.0 (127.2 to 140.9) | 150.1 (144.1 to 156.1) | 1.6 (0.4 to 2.7)                 |
| Black                                                                                                                                                                                                                                                                                                                                                                                                                                                                                                                                                                                                                                                                                                                                                                                                                                                                                                                                                                    | 113.9 (106.6 to 121.3) | 105.9 (99.8 to 112.0)  | -0.7 (-3.0 to 1.6)               |
| Hispanic/Latina                                                                                                                                                                                                                                                                                                                                                                                                                                                                                                                                                                                                                                                                                                                                                                                                                                                                                                                                                          | 80.4 (75.6 to 85.2)    | 76.4 (72.7 to 80.2)    | -0.3 (-2.1 to 1.5)               |
| White                                                                                                                                                                                                                                                                                                                                                                                                                                                                                                                                                                                                                                                                                                                                                                                                                                                                                                                                                                    | 76.2 (73.4 to 78.9)    | 72.2 (69.8 to 74.6)    | -0.8 (-1.7 to 0.0)               |
| Overall                                                                                                                                                                                                                                                                                                                                                                                                                                                                                                                                                                                                                                                                                                                                                                                                                                                                                                                                                                  | 89.4 (87.2 to 91.6)    | 88.7 (86.8 to 90.6)    | 0.0 (-0.8 to 0.8)                |
| <p><sup>a</sup>To quantify the trend over time from 2014 to 2020, the mean annual percent change of the outcome rate was calculated.</p> <p><sup>b</sup>“-“ reflects n&lt;10 individuals with the outcome in cell.</p> <p><sup>c</sup>Analysis conducted among individuals without a prior history of cesarean delivery.</p> <p><sup>d</sup>Outcome ascertained at delivery hospitalization.</p> <p><sup>e</sup>Preterm birth included a birth &lt;37 weeks based on the best obstetric estimate for any indication. Large-for-gestational-age was defined as a parity-specific standardized birthweight &gt;90th percentile, and small-for-gestational-age as &lt;10th percentile. Macrosomia was defined as a birthweight &gt;4,000 grams.</p> <p><sup>f</sup>Joinpoint regression introduced an inflection point in the year 2016.</p> <p>Abbreviations: CI (confidence interval), NICU (neonatal intensive care unit).</p> <p>N=527,395 nulliparous individuals.</p> |                        |                        |                                  |

**eTable 4. Association Between Race and Ethnicity and Adverse Pregnancy Outcomes Among Pregnant Individuals With Gestational Diabetes, U.S. Natality Files, Restricted to 2016-2020**

|                                                          | <b>Adjusted RR (95% CI)</b> |
|----------------------------------------------------------|-----------------------------|
| <b>Maternal outcomes<sup>a,b</sup></b>                   |                             |
| Cesarean delivery (n=1,168,704)                          |                             |
| American Indian                                          | 0.98 (0.95 – 1.01)          |
| Asian/Pacific Islander                                   | 0.93 (0.92 – 0.94)          |
| Black                                                    | 1.13 (1.12 – 1.14)          |
| Hispanic/Latina                                          | 1.02 (1.01 – 1.03)          |
| White                                                    | 1.00                        |
| Primary cesarean delivery (n=925,866)                    |                             |
| American Indian                                          | 0.99 (0.96 – 1.03)          |
| Asian/Pacific Islander                                   | 0.91 (0.90 – 0.93)          |
| Black                                                    | 1.24 (1.23 – 1.26)          |
| Hispanic/Latina                                          | 1.03 (1.02 – 1.04)          |
| White                                                    | 1.00                        |
| Preeclampsia or gestational hypertension (n=1,168,925)   |                             |
| American Indian                                          | 1.25 (1.19 – 1.30)          |
| Asian/Pacific Islander                                   | 0.58 (0.56 – 0.59)          |
| Black                                                    | 1.21 (1.19 – 1.22)          |
| Hispanic/Latina                                          | 0.88 (0.87 – 0.89)          |
| White                                                    | 1.00                        |
| Intensive care unit admission <sup>c</sup> (n=1,168,122) |                             |
| American Indian                                          | 1.43 (1.03 – 2.00)          |
| Asian/Pacific Islander                                   | 1.34 (1.18 – 1.52)          |
| Black                                                    | 1.51 (1.35 – 1.70)          |
| Hispanic/Latina                                          | 1.15 (1.03 – 1.28)          |
| White                                                    | 1.00                        |
| Transfusion <sup>c</sup> (n=1,168,122)                   |                             |
| American Indian                                          | 2.58 (2.20 – 3.02)          |
| Asian/Pacific Islander                                   | 1.00 (0.91 – 1.10)          |
| Black                                                    | 1.17 (1.08 – 1.27)          |
| Hispanic/Latina                                          | 0.99 (0.92 – 1.06)          |
| White                                                    | 1.00                        |
| <b>Infant outcomes<sup>a,b</sup></b>                     |                             |
| Preterm birth <37 weeks (n=1,168,795)                    |                             |
| American Indian                                          | 1.11 (1.05 – 1.16)          |
| Asian/Pacific Islander                                   | 1.03 (1.02 – 1.05)          |
| Black                                                    | 1.40 (1.38 – 1.42)          |
| Hispanic/Latina                                          | 1.18 (1.17 – 1.20)          |
| White                                                    | 1.00                        |
| NICU admission <sup>d</sup> (n=1,168,319)                |                             |
| American Indian                                          | 1.03 (0.98 – 1.08)          |
| Asian/Pacific Islander                                   | 1.04 (1.02 – 1.06)          |
| Black                                                    | 1.44 (1.42 – 1.46)          |
| Hispanic/Latina                                          | 1.12 (1.10 – 1.13)          |
| White                                                    | 1.00                        |
| Large-for-gestational age <sup>d</sup> (N=1,165,482)     |                             |
| American Indian                                          | 1.24 (1.21 – 1.28)          |
| Asian/Pacific Islander                                   | 0.52 (0.51 – 0.53)          |
| Black                                                    | 0.84 (0.83 – 0.85)          |
| Hispanic/Latina                                          | 0.95 (0.94 – 0.96)          |
| White                                                    | 1.00                        |
| Macrosomia <sup>d</sup> (n=1,168,594)                    |                             |

|                                                                                                                                                                                                                                                                                                                                                                                                                                                                                                                                                                                                                                                                                                                                       |                    |
|---------------------------------------------------------------------------------------------------------------------------------------------------------------------------------------------------------------------------------------------------------------------------------------------------------------------------------------------------------------------------------------------------------------------------------------------------------------------------------------------------------------------------------------------------------------------------------------------------------------------------------------------------------------------------------------------------------------------------------------|--------------------|
| American Indian                                                                                                                                                                                                                                                                                                                                                                                                                                                                                                                                                                                                                                                                                                                       | 1.33 (1.27 – 1.38) |
| Asian/Pacific Islander                                                                                                                                                                                                                                                                                                                                                                                                                                                                                                                                                                                                                                                                                                                | 0.50 (0.49 – 0.51) |
| Black                                                                                                                                                                                                                                                                                                                                                                                                                                                                                                                                                                                                                                                                                                                                 | 0.79 (0.77 – 0.80) |
| Hispanic/Latina                                                                                                                                                                                                                                                                                                                                                                                                                                                                                                                                                                                                                                                                                                                       | 0.92 (0.91 – 0.93) |
| White                                                                                                                                                                                                                                                                                                                                                                                                                                                                                                                                                                                                                                                                                                                                 | 1.00               |
| Small-for-gestational age <sup>d</sup> (n=1,165,482)                                                                                                                                                                                                                                                                                                                                                                                                                                                                                                                                                                                                                                                                                  |                    |
| American Indian                                                                                                                                                                                                                                                                                                                                                                                                                                                                                                                                                                                                                                                                                                                       | 0.95 (0.89 – 1.02) |
| Asian/Pacific Islander                                                                                                                                                                                                                                                                                                                                                                                                                                                                                                                                                                                                                                                                                                                | 1.87 (1.84 – 1.90) |
| Black                                                                                                                                                                                                                                                                                                                                                                                                                                                                                                                                                                                                                                                                                                                                 | 1.60 (1.57 – 1.64) |
| Hispanic/Latina                                                                                                                                                                                                                                                                                                                                                                                                                                                                                                                                                                                                                                                                                                                       | 1.09 (1.08 – 1.11) |
| White                                                                                                                                                                                                                                                                                                                                                                                                                                                                                                                                                                                                                                                                                                                                 | 1.00               |
| <p>Baseline comparison is to White.<br/> RR=relative risk<br/> <sup>a</sup>Model adjusted for: age, tobacco use in pregnancy, chronic hypertension, WIC receipt, pre-pregnancy body mass index, education status, insurance status, prior preterm birth, and delivery year. All models adjusted for prior cesarean delivery except primary cesarean delivery. Model for primary cesarean delivery conducted among individuals without a prior history of cesarean delivery.<br/> <sup>b</sup>All models except LGA and SGA adjusted for parity, as we used parity-standardized LGA and SGA definitions.<br/> <sup>c</sup>Outcome ascertained at delivery hospitalization.<br/> <sup>d</sup>Outcomes also adjusted for infant sex.</p> |                    |



| <b>eTable 5. Association Between Race and Ethnicity and Adverse Pregnancy Outcomes Restricted to Nulliparous Pregnant Individuals With Gestational Diabetes, U.S. Natality Files, 2014-2020</b> |                             |
|-------------------------------------------------------------------------------------------------------------------------------------------------------------------------------------------------|-----------------------------|
|                                                                                                                                                                                                 | <b>Adjusted RR (95% CI)</b> |
| <b>Maternal outcomes<sup>a</sup></b>                                                                                                                                                            |                             |
| Cesarean delivery (n=527,289)                                                                                                                                                                   |                             |
| American Indian                                                                                                                                                                                 | 0.99 (0.95 – 1.04)          |
| Asian/Pacific Islander                                                                                                                                                                          | 0.96 (0.95 – 0.97)          |
| Black                                                                                                                                                                                           | 1.20 (1.19 – 1.22)          |
| Hispanic/Latina                                                                                                                                                                                 | 1.06 (1.05 – 1.07)          |
| White                                                                                                                                                                                           | 1.00                        |
| Primary cesarean delivery (n=526,645)                                                                                                                                                           |                             |
| American Indian                                                                                                                                                                                 | 0.99 (0.95 – 1.04)          |
| Asian/Pacific Islander                                                                                                                                                                          | 0.96 (0.95 – 0.97)          |
| Black                                                                                                                                                                                           | 1.20 (1.19 – 1.22)          |
| Hispanic/Latina                                                                                                                                                                                 | 1.06 (1.05 – 1.07)          |
| White                                                                                                                                                                                           | 1.00                        |
| Preeclampsia or gestational hypertension (n=527,395)                                                                                                                                            |                             |
| American Indian                                                                                                                                                                                 | 1.25 (1.18 – 1.33)          |
| Asian/Pacific Islander                                                                                                                                                                          | 0.56 (0.54 – 0.57)          |
| Black                                                                                                                                                                                           | 1.18 (1.15 – 1.20)          |
| Hispanic/Latina                                                                                                                                                                                 | 0.90 (0.89 – 0.92)          |
| White                                                                                                                                                                                           | 1.00                        |
| Intensive care unit admission <sup>b</sup> (n=526,922)                                                                                                                                          |                             |
| American Indian                                                                                                                                                                                 | 1.42 (0.82 – 2.46)          |
| Asian/Pacific Islander                                                                                                                                                                          | 1.14 (0.95 – 1.37)          |
| Black                                                                                                                                                                                           | 1.47 (1.23 – 1.75)          |
| Hispanic/Latina                                                                                                                                                                                 | 1.21 (1.03 – 1.42)          |
| White                                                                                                                                                                                           | 1.00                        |
| Transfusion <sup>b</sup> (n=526,922)                                                                                                                                                            |                             |
| American Indian                                                                                                                                                                                 | 3.08 (2.41 – 3.93)          |
| Asian/Pacific Islander                                                                                                                                                                          | 0.95 (0.84 – 1.08)          |
| Black                                                                                                                                                                                           | 1.00 (0.88 – 1.15)          |
| Hispanic/Latina                                                                                                                                                                                 | 0.91 (0.82 – 1.02)          |
| White                                                                                                                                                                                           | 1.00                        |
| <b>Infant outcomes<sup>a</sup></b>                                                                                                                                                              |                             |
| Preterm birth <37 weeks (n=527,335)                                                                                                                                                             |                             |
| American Indian                                                                                                                                                                                 | 1.10 (1.01 – 1.19)          |
| Asian/Pacific Islander                                                                                                                                                                          | 1.01 (0.99 – 1.04)          |
| Black                                                                                                                                                                                           | 1.42 (1.39 – 1.46)          |
| Hispanic/Latina                                                                                                                                                                                 | 1.15 (1.13 – 1.18)          |
| White                                                                                                                                                                                           | 1.00                        |
| NICU admission <sup>c</sup> (n=526,940)                                                                                                                                                         |                             |
| American Indian                                                                                                                                                                                 | 1.00 (0.92 – 1.09)          |
| Asian/Pacific Islander                                                                                                                                                                          | 1.12 (1.10 – 1.14)          |
| Black                                                                                                                                                                                           | 1.46 (1.43 – 1.50)          |
| Hispanic/Latina                                                                                                                                                                                 | 1.19 (1.17 – 1.21)          |
| White                                                                                                                                                                                           | 1.00                        |
| Large-for-gestational age <sup>c</sup> (n=526,436)                                                                                                                                              |                             |
| American Indian                                                                                                                                                                                 | 1.23 (1.17 – 1.29)          |
| Asian/Pacific Islander                                                                                                                                                                          | 0.48 (0.47 – 0.50)          |
| Black                                                                                                                                                                                           | 0.85 (0.83 – 0.87)          |
| Hispanic/Latina                                                                                                                                                                                 | 0.95 (0.94 – 0.97)          |
| White                                                                                                                                                                                           | 1.00                        |
| Macrosomia <sup>c</sup> (n=527,211)                                                                                                                                                             |                             |

|                                                                                                                                                                                                                                                                                                                                                                                                                                                                                                                                                                                     |                    |
|-------------------------------------------------------------------------------------------------------------------------------------------------------------------------------------------------------------------------------------------------------------------------------------------------------------------------------------------------------------------------------------------------------------------------------------------------------------------------------------------------------------------------------------------------------------------------------------|--------------------|
| American Indian                                                                                                                                                                                                                                                                                                                                                                                                                                                                                                                                                                     | 1.31 (1.21 – 1.43) |
| Asian/Pacific Islander                                                                                                                                                                                                                                                                                                                                                                                                                                                                                                                                                              | 0.46 (0.45 – 0.48) |
| Black                                                                                                                                                                                                                                                                                                                                                                                                                                                                                                                                                                               | 0.82 (0.79 – 0.84) |
| Hispanic/Latina                                                                                                                                                                                                                                                                                                                                                                                                                                                                                                                                                                     | 0.93 (0.91 – 0.96) |
| White                                                                                                                                                                                                                                                                                                                                                                                                                                                                                                                                                                               | 1.00               |
| Small-for-gestational age <sup>c</sup> (n=526,436)                                                                                                                                                                                                                                                                                                                                                                                                                                                                                                                                  |                    |
| American Indian                                                                                                                                                                                                                                                                                                                                                                                                                                                                                                                                                                     | 0.94 (0.85 – 1.05) |
| Asian/Pacific Islander                                                                                                                                                                                                                                                                                                                                                                                                                                                                                                                                                              | 1.80 (1.76 – 1.84) |
| Black                                                                                                                                                                                                                                                                                                                                                                                                                                                                                                                                                                               | 1.58 (1.54 – 1.63) |
| Hispanic/Latina                                                                                                                                                                                                                                                                                                                                                                                                                                                                                                                                                                     | 1.10 (1.08 – 1.13) |
| White                                                                                                                                                                                                                                                                                                                                                                                                                                                                                                                                                                               | 1.00               |
| <p>Baseline comparison is to White.<br/> RR=relative risk<br/> <sup>a</sup>Model adjusted for: age, tobacco use in pregnancy, chronic hypertension, WIC receipt, pre-pregnancy body mass index, education status, insurance status, and delivery year. All models adjusted for prior cesarean delivery except primary cesarean delivery. Model for primary cesarean delivery conducted among individuals without a prior history of cesarean delivery.<br/> <sup>b</sup>Outcome ascertained at delivery hospitalization.<br/> <sup>c</sup>Outcome also adjusted for infant sex.</p> |                    |

**eTable 6. Disparity Ratios for Adverse Pregnancy Outcomes Comparing Each Subgroup to White Individuals (Reference), U.S. Natality Files, 2014-2020**

|                                          | <b>2014</b>                     | <b>2020</b>                     |
|------------------------------------------|---------------------------------|---------------------------------|
| <b>Maternal outcomes</b>                 | <b>Disparity Ratio (95% CI)</b> | <b>Disparity Ratio (95% CI)</b> |
| Cesarean delivery                        |                                 |                                 |
| American Indian                          | 0.89 (0.85 to 0.94)             | 0.90 (0.85 to 0.94)             |
| Asian/Pacific Islander                   | 0.94 (0.92 to 0.96)             | 0.93 (0.92 to 0.95)             |
| Black                                    | 1.17 (1.16 to 1.20)             | 1.19 (1.17 to 1.21)             |
| Hispanic/Latina                          | 1.01 (1.00 to 1.02)             | 1.01 (1.00 to 1.02)             |
| White                                    | 1.00                            | 1.00                            |
| Primary cesarean delivery                |                                 |                                 |
| American Indian                          | 0.83 (0.77 to 0.89)             | 0.82 (0.76 to 0.88)             |
| Asian/Pacific Islander                   | 0.92 (0.90 to 0.95)             | 0.92 (0.90 to 0.95)             |
| Black                                    | 1.22 (1.20 to 1.25)             | 1.21 (1.18 to 1.23)             |
| Hispanic/Latina                          | 0.90 (0.88 to 0.92)             | 0.90 (0.89 to 0.92)             |
| White                                    | 1.00                            | 1.00                            |
| Preeclampsia or gestational hypertension |                                 |                                 |
| American Indian                          | 1.13 (1.02 to 1.25)             | 1.22 (1.13 to 1.32)             |
| Asian/Pacific Islander                   | 0.51 (0.48 to 0.54)             | 0.57 (0.55 to 0.59)             |
| Black                                    | 1.25 (1.21 to 1.30)             | 1.20 (1.17 to 1.23)             |
| Hispanic/Latina                          | 0.84 (0.82 to 0.87)             | 0.90 (0.88 to 0.92)             |
| White                                    | 1.00                            | 1.00                            |
| Intensive care unit admission            |                                 |                                 |
| American Indian                          | 1.33 (0.59 to 3.00)             | 0.54 (0.17 to 1.69)             |
| Asian/Pacific Islander                   | 1.13 (0.81 to 1.57)             | 1.28 (0.98 to 1.66)             |
| Black                                    | 1.99 (1.53 to 2.60)             | 1.58 (1.24 to 2.01)             |
| Hispanic/Latina                          | 1.52 (1.22 to 1.91)             | 1.12 (0.91 to 1.38)             |
| White                                    | 1.00                            | 1.00                            |
| Transfusion                              |                                 |                                 |
| American Indian                          | 2.31 (1.49 to 3.58)             | 3.00 (2.24 to 4.02)             |
| Asian/Pacific Islander                   | 0.86 (0.66 to 1.11)             | 0.98 (0.83 to 1.17)             |
| Black                                    | 1.23 (0.99 to 1.54)             | 1.01 (0.86 to 1.20)             |
| Hispanic/Latina                          | 0.87 (0.72 to 1.05)             | 0.97 (0.85 to 1.10)             |
| White                                    | 1.00                            | 1.00                            |
| <b>Infant outcomes</b>                   |                                 |                                 |
| Preterm birth <37 weeks                  |                                 |                                 |
| American Indian                          | 1.14 (1.02 to 1.27)             | 1.20 (1.09 to 1.32)             |
| Asian/Pacific Islander                   | 0.94 (0.89 to 0.98)             | 0.94 (0.91 to 0.98)             |
| Black                                    | 1.52 (1.46 to 1.58)             | 1.53 (1.49 to 1.58)             |
| Hispanic/Latina                          | 1.17 (1.13 to 1.20)             | 1.17 (1.14 to 1.20)             |
| White                                    | 1.00                            | 1.00                            |
| NICU admission                           |                                 |                                 |
| American Indian                          | 1.06 (0.94 to 1.19)             | 1.00 (0.90 to 1.11)             |
| Asian/Pacific Islander                   | 1.01 (0.97 to 1.06)             | 0.91 (0.88 to 0.95)             |
| Black                                    | 1.53 (1.48 to 1.59)             | 1.48 (1.43 to 1.52)             |
| Hispanic/Latina                          | 1.10 (1.07 to 1.14)             | 1.06 (1.03 to 1.09)             |
| White                                    | 1.00                            | 1.00                            |
| Large-for-gestational age                |                                 |                                 |
| American Indian                          | 1.42 (1.38 to 1.46)             | 1.33 (1.25 to 1.42)             |
| Asian/Pacific Islander                   | 0.50 (0.48 to 0.52)             | 0.44 (0.43 to 0.46)             |
| Black                                    | 0.92 (0.89 to 0.94)             | 0.89 (0.86 to 0.91)             |
| Hispanic/Latina                          | 0.98 (0.96 to 1.01)             | 0.97 (0.95 to 0.98)             |
| White                                    | 1.00                            | 1.00                            |

|                                  |                     |                     |
|----------------------------------|---------------------|---------------------|
| <b>Macrosomia</b>                |                     |                     |
| American Indian                  | 1.44 (1.33 to 1.57) | 1.49 (1.37 to 1.63) |
| Asian/Pacific Islander           | 0.49 (0.46 to 0.52) | 0.44 (0.42 to 0.46) |
| Black                            | 0.86 (0.83 to 0.90) | 0.85 (0.82 to 0.88) |
| Hispanic/Latina                  | 1.01 (0.99 to 1.05) | 1.06 (1.03 to 1.09) |
| White                            | 1.00                | 1.00                |
| <b>Small-for-gestational age</b> |                     |                     |
| American Indian                  | 0.80 (0.68 to 0.94) | 0.96 (0.84 to 1.11) |
| Asian/Pacific Islander           | 1.84 (1.76 to 1.92) | 2.13 (2.05 to 2.20) |
| Black                            | 1.56 (1.50 to 1.63) | 1.52 (1.46 to 1.58) |
| Hispanic/Latina                  | 1.03 (0.99 to 1.07) | 1.08 (1.04 to 1.12) |
| White                            | 1.00                | 1.00                |

| <b>eTable 7. P-values for Interaction of Race/Ethnicity (Referent White Individuals) With Year of Delivery, U.S. Natality Files, 2014-2020</b> |                                  |
|------------------------------------------------------------------------------------------------------------------------------------------------|----------------------------------|
|                                                                                                                                                | <b>Overall for all subgroups</b> |
| <b>Maternal outcomes<sup>a,b</sup></b>                                                                                                         | <b>p-value</b>                   |
| Cesarean delivery                                                                                                                              |                                  |
| American Indian                                                                                                                                | 0.91                             |
| Asian/Pacific Islander                                                                                                                         | 0.79                             |
| Black                                                                                                                                          | 0.23                             |
| Hispanic/Latina                                                                                                                                | 0.41                             |
| Overall                                                                                                                                        | 0.47                             |
| Primary cesarean delivery                                                                                                                      |                                  |
| American Indian                                                                                                                                | 0.97                             |
| Asian/Pacific Islander                                                                                                                         | 0.82                             |
| Black                                                                                                                                          | 0.43                             |
| Hispanic/Latina                                                                                                                                | 0.19                             |
| Overall                                                                                                                                        | 0.47                             |
| Preeclampsia or gestational hypertension                                                                                                       |                                  |
| American Indian                                                                                                                                | 0.50                             |
| Asian/Pacific Islander                                                                                                                         | 0.53                             |
| Black                                                                                                                                          | 0.03                             |
| Hispanic/Latina                                                                                                                                | 0.20                             |
| Overall                                                                                                                                        | 0.50                             |
| Intensive care unit admission                                                                                                                  |                                  |
| American Indian                                                                                                                                | 0.29                             |
| Asian/Pacific Islander                                                                                                                         | 0.25                             |
| Black                                                                                                                                          | 0.02                             |
| Hispanic/Latina                                                                                                                                | 0.01                             |
| Overall                                                                                                                                        | 0.51                             |
| Transfusion                                                                                                                                    |                                  |
| American Indian                                                                                                                                | 0.11                             |
| Asian/Pacific Islander                                                                                                                         | 0.34                             |
| Black                                                                                                                                          | 0.37                             |
| Hispanic/Latina                                                                                                                                | 0.60                             |
| Overall                                                                                                                                        | 0.37                             |
| <b>Infant outcomes<sup>a,b</sup></b>                                                                                                           |                                  |
| Preterm birth <37 weeks                                                                                                                        |                                  |
| American Indian                                                                                                                                | 0.45                             |
| Asian/Pacific Islander                                                                                                                         | 0.81                             |
| Black                                                                                                                                          | 0.66                             |
| Hispanic/Latina                                                                                                                                | 0.69                             |
| Overall                                                                                                                                        | 0.89                             |
| NICU admission <sup>c</sup>                                                                                                                    |                                  |
| American Indian                                                                                                                                | 0.04                             |
| Asian/Pacific Islander                                                                                                                         | <0.001                           |
| Black                                                                                                                                          | 0.001                            |
| Hispanic/Latina                                                                                                                                | <0.001                           |
| Overall                                                                                                                                        | <0.001                           |
| Large-for-gestational age <sup>c</sup>                                                                                                         |                                  |
| American Indian                                                                                                                                | 0.39                             |
| Asian/Pacific Islander                                                                                                                         | <0.001                           |
| Black                                                                                                                                          | 0.29                             |
| Hispanic/Latina                                                                                                                                | 0.16                             |
| Overall                                                                                                                                        | <0.01                            |
| Macrosomia <sup>c</sup>                                                                                                                        |                                  |
| American Indian                                                                                                                                | 0.37                             |

|                                                                                                                                                                                                                                                                                                                                                                                                                                                                                                                                                                                                                                                                                                  |        |
|--------------------------------------------------------------------------------------------------------------------------------------------------------------------------------------------------------------------------------------------------------------------------------------------------------------------------------------------------------------------------------------------------------------------------------------------------------------------------------------------------------------------------------------------------------------------------------------------------------------------------------------------------------------------------------------------------|--------|
| Asian/Pacific Islander                                                                                                                                                                                                                                                                                                                                                                                                                                                                                                                                                                                                                                                                           | <0.01  |
| Black                                                                                                                                                                                                                                                                                                                                                                                                                                                                                                                                                                                                                                                                                            | 0.39   |
| Hispanic/Latina                                                                                                                                                                                                                                                                                                                                                                                                                                                                                                                                                                                                                                                                                  | 0.77   |
| Overall                                                                                                                                                                                                                                                                                                                                                                                                                                                                                                                                                                                                                                                                                          | 0.04   |
| Small-for-gestational age <sup>c</sup>                                                                                                                                                                                                                                                                                                                                                                                                                                                                                                                                                                                                                                                           |        |
| American Indian                                                                                                                                                                                                                                                                                                                                                                                                                                                                                                                                                                                                                                                                                  | 0.13   |
| Asian/Pacific Islander                                                                                                                                                                                                                                                                                                                                                                                                                                                                                                                                                                                                                                                                           | <0.001 |
| Black                                                                                                                                                                                                                                                                                                                                                                                                                                                                                                                                                                                                                                                                                            | 0.79   |
| Hispanic/Latina                                                                                                                                                                                                                                                                                                                                                                                                                                                                                                                                                                                                                                                                                  | 0.001  |
| Overall                                                                                                                                                                                                                                                                                                                                                                                                                                                                                                                                                                                                                                                                                          | <0.001 |
| <sup>a</sup> All models adjusted for: racial and ethnic subgroup x delivery year (interaction term), racial and ethnic subgroup, delivery year, age, tobacco use in pregnancy, chronic hypertension, WIC receipt, pre-pregnancy body mass index, education status, insurance status, and prior preterm birth. All models adjusted for prior cesarean delivery except primary cesarean delivery. Model for primary cesarean delivery conducted among individuals without a prior history of cesarean delivery.<br><sup>b</sup> All models except LGA and SGA adjusted for parity, as parity-standardized LGA and SGA definitions were used.<br><sup>c</sup> Outcome also adjusted for infant sex. |        |

eFigure. Directed Acyclic Graph (DAG)

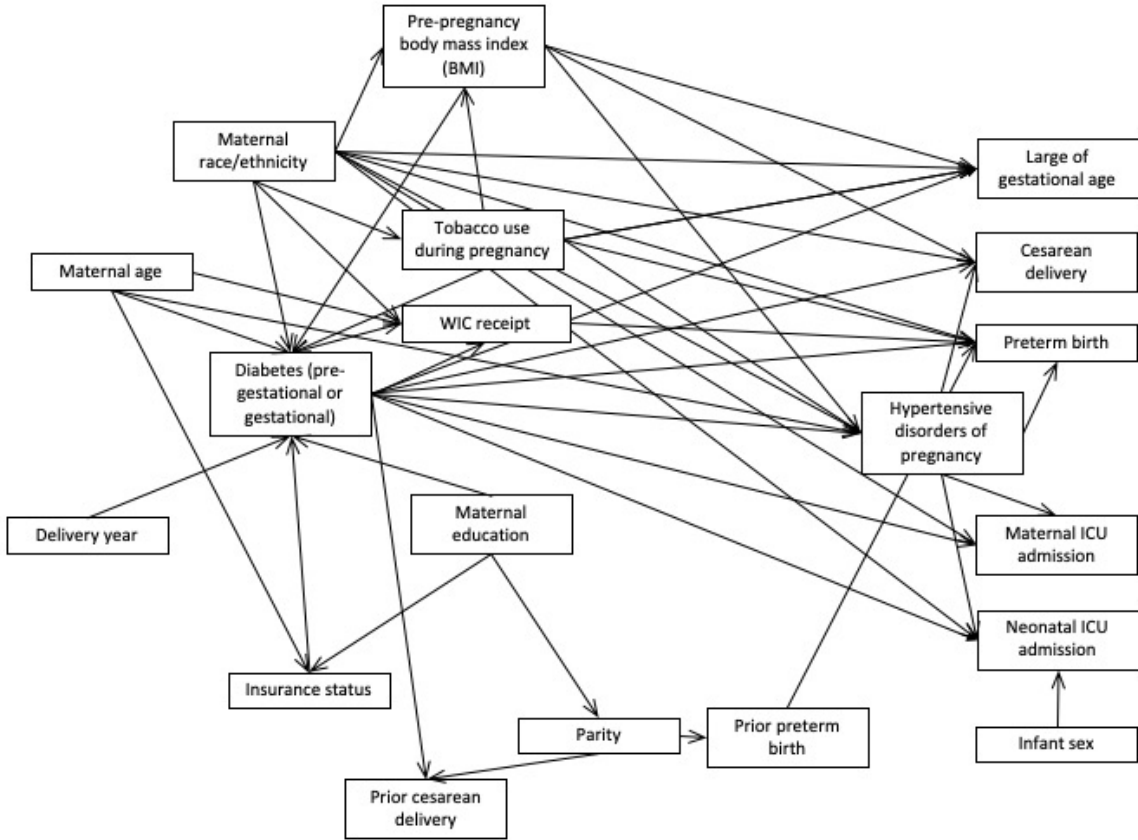

Supplement: jama-e223189-s001.pdf [file jama-e223189-s001.pdf]
